# Supplementary material for: Advancing the Therapeutic Potential of Indoleamides for Tuberculosis
Source: PubMed Central journal article supplement (PMC6591635; doi:10.1128/aac.00343-19), 2019-06-24
Supplement: AAC.00343-19-s0001.pdf [file AAC.00343-19-s0001.pdf]

Table S1. Plasma PK parameters of JS-2-02 in different formulations in mouse (n=3)

| Parameters   | ORAL FORMULATIONS        |                                          |                  |                         |
|--------------|--------------------------|------------------------------------------|------------------|-------------------------|
|              | 0.5% w/v methylcellulose | 0.5% w/v methylcellulose nano-suspension | Solid dispersion | PG: Tween 80 Suspension |
| Dose (mg/kg) | 10                       | 10                                       | 10               | 10                      |
| F (%)        | 22                       | 24                                       | 7                | 96                      |

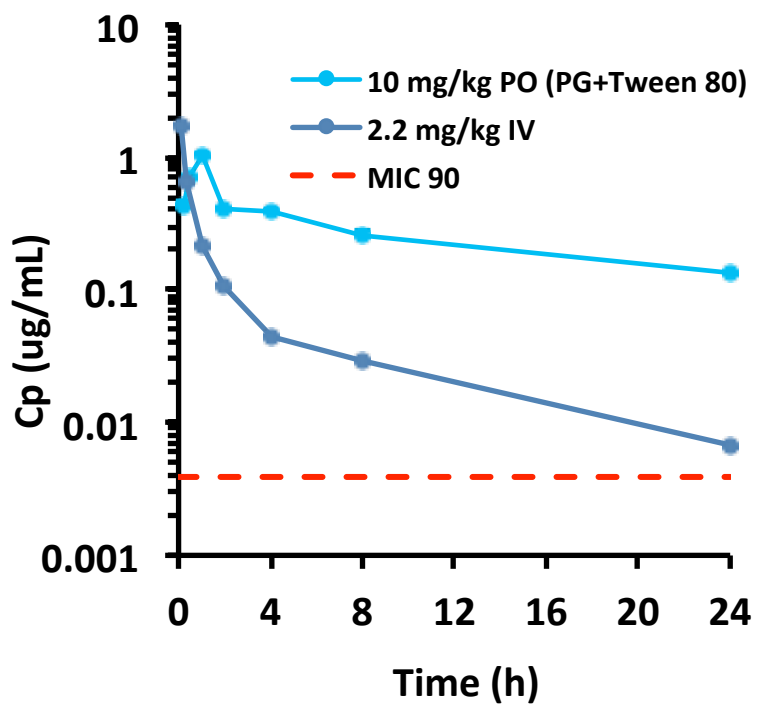

Fig. S1. Plasma concentration of compound 2 after single dose administration

Table S2. Comparative dose ranging in acute mouse infection and monotherapy model

|     | <b>D-13</b> | <b>D0</b> | <b>D28</b> |           |           |
|-----|-------------|-----------|------------|-----------|-----------|
|     |             |           | UT         | compound2 | compound3 |
| UT  | 3.72±0.02   | 6.27±0.10 | 7.21±0.10  |           |           |
| 3   |             |           |            | 7.11±0.07 | 7.05±0.09 |
| 10  |             |           |            | 6.54±0.26 | 6.99±0.19 |
| 30  |             |           |            | 5.25±0.14 | 5.66±0.14 |
| 100 |             |           |            | 3.64±0.37 | 4.15±0.06 |
| 200 |             |           |            | 3.43±0.14 | 3.65±0.11 |
